# Supplementary material
Source: HighWire-hosted journal article supplement (https://www.annfammed.org/highwire/filestream/14185/field_highwire_adjunct_files/0/Linzer.pdf)
Supplement: Linzer.pdf [file Linzer.pdf]

## Supplemental materials for

Linzer M, Neprash H, Brown R, et al. Where trust flourishes: perceptions of clinicians who trust their organizations and are trusted by their patients. *Ann Fam Med*. 2021;19(6):521-526.

| <b>Supplemental Table 1. Organizational Culture Domains</b>                                                                                                                                                                                                                                                                                      |
|--------------------------------------------------------------------------------------------------------------------------------------------------------------------------------------------------------------------------------------------------------------------------------------------------------------------------------------------------|
| In response to the question, “To what degree do the following statements reflect the conditions in your group practice?” on a scale from 1 to 4, where 1 = not at all, and 4 = to a great extent. The letter prior to each statement refers to item on the MEMO Clinician Survey. McDonald omega and mean scores were calculated using HWP data. |
| <b>Organizational trust scale: McDonald omega = 0.829, mean = 2.82, SD = 0.61</b>                                                                                                                                                                                                                                                                |
| q. There is a strong sense of belonging to the group                                                                                                                                                                                                                                                                                             |
| s. There is a great deal of organizational loyalty                                                                                                                                                                                                                                                                                               |
| t. There is a strong sense of responsibility to help one of our physicians if he/she has a personal problem                                                                                                                                                                                                                                      |
| y. We encourage the internal reporting of all adverse patient care events                                                                                                                                                                                                                                                                        |
| z. There is a high degree of organizational trust                                                                                                                                                                                                                                                                                                |
| <b>Values alignment between clinicians and leaders scale: McDonald omega = 0.865, mean = 2.36, SD = 0.61</b>                                                                                                                                                                                                                                     |
| c. Our physician compensation formula is well aligned with our organization's goals                                                                                                                                                                                                                                                              |
| e. There is broad involvement of physicians in most financial decisions                                                                                                                                                                                                                                                                          |
| f. Our administrators obtain and provide us with information that helps us improve the cost effectiveness of our patient care                                                                                                                                                                                                                    |
| g. Our compensation plan rewards those who work hard for our group                                                                                                                                                                                                                                                                               |
| k. Our physician compensation formula is well understood by our physicians                                                                                                                                                                                                                                                                       |
| l. Our administrative decision-making process is described as consensus building                                                                                                                                                                                                                                                                 |
| o. The business office and administration are considered to be a very important part of our group practice                                                                                                                                                                                                                                       |
| r. There is rapid change in clinical practice among our physicians when studies indicate that we can improve quality/reduce costs                                                                                                                                                                                                                |
| <b>Quality emphasis scale: McDonald omega = 0.896, mean = 2.84, SD = 0.53</b>                                                                                                                                                                                                                                                                    |
| b. Physicians who develop inappropriate patient care practices will be “talked to”                                                                                                                                                                                                                                                               |

|                                                                                                                                                                                                                                                                                                                                                                                                                                  |
|----------------------------------------------------------------------------------------------------------------------------------------------------------------------------------------------------------------------------------------------------------------------------------------------------------------------------------------------------------------------------------------------------------------------------------|
| i. We emphasize patient satisfaction                                                                                                                                                                                                                                                                                                                                                                                             |
| j. The quality of each physician's work is closely monitored                                                                                                                                                                                                                                                                                                                                                                     |
| m. There is an identifiable practice style that we all try to adhere to                                                                                                                                                                                                                                                                                                                                                          |
| u. There is a high level of commitment to measuring clinical outcomes                                                                                                                                                                                                                                                                                                                                                            |
| v. Quality of care is goal one                                                                                                                                                                                                                                                                                                                                                                                                   |
| bb. We have developed a common standard of care                                                                                                                                                                                                                                                                                                                                                                                  |
| cc. Our clinical leadership is concerned with quality of care issues                                                                                                                                                                                                                                                                                                                                                             |
| dd. Adequate training is provided in dealing with quality of care issues                                                                                                                                                                                                                                                                                                                                                         |
| ee. Making changes to reduce the possibility of substandard care is difficult                                                                                                                                                                                                                                                                                                                                                    |
| aa. There is a general agreement on treatment methods                                                                                                                                                                                                                                                                                                                                                                            |
| <b>Information/Communication scale: McDonald omega = 0.649, mean = 3.19, SD = 0.47</b>                                                                                                                                                                                                                                                                                                                                           |
| n. We have very good methods to assure that our physicians change their practices to include new technologies and research findings                                                                                                                                                                                                                                                                                              |
| p. We rely heavily on electronic information systems to provide cost effective care                                                                                                                                                                                                                                                                                                                                              |
| w. We rely heavily on computer-based information when seeing a patient                                                                                                                                                                                                                                                                                                                                                           |
| x. Candid and open communications exist between physicians and nurses                                                                                                                                                                                                                                                                                                                                                            |
| <b>Cohesiveness scale: McDonald omega = 0.701, mean = 2.79, SD = 0.57</b>                                                                                                                                                                                                                                                                                                                                                        |
| a. There is widespread agreement about most moral/ethical issues                                                                                                                                                                                                                                                                                                                                                                 |
| d. There is a great deal of sharing of clinical information                                                                                                                                                                                                                                                                                                                                                                      |
| h. There is an open discussion of clinical failures                                                                                                                                                                                                                                                                                                                                                                              |
| Scales adapted from: Kralewski JD, et al. <i>Medical Care</i> . 1996;34:377–388. Table adapted from chapter, Organizational climate, stress, and error in primary care: by Linzer M, et al. in <i>Advances in Patient Safety: (Volume 1)</i> . Henriksen K, et al., editors. Rockville (MD): Agency for Healthcare Research and Quality; 2005. MEMO = Minimizing Error Maximizing Outcome study; HWP = Healthy Work Place trial. |

|                                                                                                                |
|----------------------------------------------------------------------------------------------------------------|
| <b>Supplemental Table 2.</b> Patient Trust Scale: McDonald omega = 0.963, mean = 4.54, SD = 0.74               |
| How much do you trust your health care provider's judgment about your medical care?                            |
| How much do you trust your provider to put your health and well-being above all money considerations?          |
| How much do you trust your provider to make appropriate medical decisions regardless of health plan rules?     |
| How much do you trust your health care provider overall?                                                       |
| Scale adapted from: Kao AC et al. Patients' trust in their physicians. <i>J Gen Intern Med.</i> 1998;13:681-6. |

| <b>Supplemental Table 3. Sample description</b> |              |                    |
|-------------------------------------------------|--------------|--------------------|
| Patient - Level                                 |              |                    |
|                                                 | Mean         | Standard Deviation |
| Age                                             | 63.7         | 12.2               |
|                                                 | Frequency    | Percent            |
| Patient Gender                                  |              |                    |
| Male                                            | 441          | 39.3%              |
| Female                                          | 681          | 60.7%              |
| Educational level                               |              |                    |
| Some high school                                | 120          | 10.8%              |
| High school                                     | 373          | 33.6%              |
| Some college                                    | 206          | 18.5%              |
| Technical school                                | 138          | 12.4%              |
| College degree                                  | 174          | 15.6%              |
| Graduate school                                 | 99           | 8.9%               |
| Racial and ethnic minoritized status            |              |                    |
| Minoritized                                     | 296          | 26.5%              |
| Non-minoritized                                 | 819          | 73.5%              |
| Marital Status                                  |              |                    |
| Single                                          | 408          | 36.6%              |
| Married                                         | 704          | 63.4%              |
| Insurance coverage                              |              |                    |
| No                                              | 72           | 6.4%               |
| Yes                                             | 1047         | 93.6%              |
| Language Spoken                                 |              |                    |
| Non-English                                     | 109          | 9.7%               |
| English                                         | 1008         | 90.3%              |
| Patient general health                          |              |                    |
| Excellent                                       | 40           | 3.6%               |
| Very good                                       | 252          | 23.1%              |
| Good                                            | 519          | 47.6%              |
| Fair                                            | 238          | 21.8%              |
| Poor                                            | 40           | 3.6%               |
| Clinician - Level                               |              |                    |
|                                                 | Mean and SDs | Standard Deviation |
| Clinician Age                                   | 47.3         | 9.2                |
| Clinician Years in practice                     | 12.8         | 8.9                |
| Monthly patient load                            | 1054.6       | 1682.6             |
|                                                 | Frequency    | Percent            |
| Clinician Gender                                |              |                    |
| Male                                            | 79           | 47.9%              |
| Female                                          | 86           | 52.1%              |
| MD/DO vs APC                                    |              |                    |

|                                                                                    |           |                    |
|------------------------------------------------------------------------------------|-----------|--------------------|
| MD/DO                                                                              | 143       | 86.7%              |
| NP                                                                                 | 22        | 13.3%              |
| Clinician Specialty                                                                |           |                    |
| Internal Medicine                                                                  | 105       | 63.6%              |
| Family Medicine                                                                    | 60        | 36.4%              |
| Clinician Racial and Ethnic Minoritized Status                                     |           |                    |
| Minoritized                                                                        | 27        | 16.8%              |
| Non-minoritized                                                                    | 134       | 83.2%              |
| Racial Concordance with patients                                                   |           |                    |
| Concordant                                                                         | 106       | 65.8%              |
| Discordant                                                                         | 55        | 34.2%              |
| Clinic - Level                                                                     |           |                    |
|                                                                                    | Mean      | Standard Deviation |
| Average Number of Clinicians                                                       | 29.1      | 20.2               |
|                                                                                    | Frequency | Percent            |
| Clinic Location                                                                    |           |                    |
| Rural                                                                              | 10        | 29.4%              |
| Suburban                                                                           | 14        | 41.2%              |
| Urban – inner city                                                                 | 10        | 29.4%              |
| APC = advanced practice clinician; DO = doctor of osteopathy; MD = medical doctor. |           |                    |

| <b>Supplemental Table 4.</b> Two- level (patient-clinician linkage nested within clinics) logistic regression model of high/low trust. |            |           |       |       |                         |          |
|----------------------------------------------------------------------------------------------------------------------------------------|------------|-----------|-------|-------|-------------------------|----------|
| Variables                                                                                                                              | Odds Ratio | Std. Err. | z     | P> z  | 95% Confidence Interval |          |
| Fixed Effects                                                                                                                          |            |           |       |       | Lower                   | Upper    |
| Values Alignment                                                                                                                       | 1.857042   | .3928832  | 2.93  | 0.003 | 1.226699                | 2.811288 |
| Clinician Age                                                                                                                          | 1.010789   | .0489247  | 0.22  | 0.825 | .9193059                | 1.111375 |
|                                                                                                                                        |            |           |       |       |                         |          |
| Clinician Sex                                                                                                                          |            |           |       |       |                         |          |
| Female                                                                                                                                 | 1.240584   | 1.03124   | 0.26  | 0.795 | .2432551                | 6.326893 |
|                                                                                                                                        |            |           |       |       |                         |          |
| MD_APC                                                                                                                                 |            |           |       |       |                         |          |
| APC                                                                                                                                    | 1.818723   | 1.923884  | 0.57  | 0.572 | .2287426                | 14.46058 |
|                                                                                                                                        |            |           |       |       |                         |          |
| Clinician variables                                                                                                                    |            |           |       |       |                         |          |
| Specialty - Family Medicine                                                                                                            | .4690802   | .4932554  | -0.72 | 0.472 | .0597278                | 3.683982 |
| Racial and Ethnic Discordance                                                                                                          | 1.245254   | 1.188415  | 0.23  | 0.818 | .1918269                | 8.083631 |
| Patient Load                                                                                                                           | 1.000687   | .000345   | 1.99  | 0.046 | 1.000011                | 1.001363 |
| Constant                                                                                                                               | .0094061   | .0292919  | -1.50 | 0.134 | .000021                 | 4.20894  |
| Random effect                                                                                                                          |            |           |       |       |                         |          |
| Clinic-level Variance                                                                                                                  | 1.772821   | 1.681009  |       |       | .2764048                | 11.37062 |

| Variables                     | Odds Ratio | Std. Err. | z     | P> z  | 95% Confidence Interval |          |
|-------------------------------|------------|-----------|-------|-------|-------------------------|----------|
|                               |            |           |       |       | Lower                   | Upper    |
| Emphasis on quality           | 4.953533   | 2.267584  | 3.50  | 0.000 | 2.019573                | 12.14984 |
| Clinician Age                 | 1.01725    | .0514961  | 0.34  | 0.735 | .9211646                | 1.123357 |
|                               |            |           |       |       |                         |          |
| Clinician Sex                 |            |           |       |       |                         |          |
| Female                        | .7865165   | .6384588  | -0.30 | 0.767 | .1602288                | 3.860781 |
|                               |            |           |       |       |                         |          |
| MD_APC                        |            |           |       |       |                         |          |
| APC                           | 1.248244   | 1.438682  | 0.19  | 0.847 | .130387                 | 11.94991 |
|                               |            |           |       |       |                         |          |
| Clinician variables           |            |           |       |       |                         |          |
| Specialty - Family Medicine   | .3012636   | .2939098  | -1.23 | 0.219 | .0445167                | 2.038781 |
| Racial and Ethnic Discordance | 1.206905   | 1.146749  | 0.20  | 0.843 | .1874555                | 7.770482 |
| Patient Load                  | 1.000322   | .0003044  | 1.06  | 0.290 | .9997259                | 1.000919 |
| Constant                      | .0002623   | .0009452  | -2.29 | 0.022 | 2.24e-07                | .3065286 |
| Random effect                 |            |           |       |       |                         |          |
| Clinic-level Variance         | .9132142   | 1.477109  |       |       | .0383502                | 21.74591 |

| Variables              | Odds Ratio | Std. Err. | z    | P> z  | 95% Confidence Interval |          |
|------------------------|------------|-----------|------|-------|-------------------------|----------|
| Fixed Effects          |            |           |      |       | Lower                   | Upper    |
| Clinician cohesiveness | 2.289327   | .7098691  | 2.67 | 0.008 | 1.246721                | 4.203842 |
| Clinician Age          | 1.065868   | .0704323  | 0.97 | 0.334 | .936389                 | 1.213251 |
|                        |            |           |      |       |                         |          |

|                               |          |          |       |       |          |          |
|-------------------------------|----------|----------|-------|-------|----------|----------|
| Clinician Sex                 |          |          |       |       |          |          |
| Female                        | .8465265 | .7786467 | -0.18 | 0.856 | .1395384 | 5.135556 |
|                               |          |          |       |       |          |          |
| MD_APC                        |          |          |       |       |          |          |
| APC                           | 2.871932 | 3.540576 | 0.86  | 0.392 | .2563279 | 32.17752 |
|                               |          |          |       |       |          |          |
| Clinician Variables           |          |          |       |       |          |          |
| Specialty - Family Medicine   | .2707391 | .3983334 | -0.89 | 0.375 | .0151424 | 4.840698 |
| Racial and Ethnic Discordance | 1.69242  | 1.984097 | 0.45  | 0.654 | .1700621 | 16.84258 |
| Patient Load                  | 1.000325 | .0004165 | 0.78  | 0.435 | .9995091 | 1.001142 |
| Constant                      | .0001005 | .000492  | -1.88 | 0.060 | 6.81e-09 | 1.482917 |
| Random effect                 |          |          |       |       |          |          |
| Clinic-level Variance         | 3.26858  | 3.669932 |       |       | .3619409 | 29.51757 |

| Variables                                 | Odds Ratio | Std. Err. | z    | P> z  | 95% Confidence Interval |          |
|-------------------------------------------|------------|-----------|------|-------|-------------------------|----------|
| Fixed Effects                             |            |           |      |       | Lower                   | Upper    |
| Emphasis on communication and information | 3.212874   | 1.450771  | 2.58 | 0.010 | 1.325972                | 7.784904 |
| Clinician Age                             | 1.023947   | .0607926  | 0.40 | 0.690 | .911467                 | 1.150308 |
|                                           |            |           |      |       |                         |          |
| Clinician Sex                             |            |           |      |       |                         |          |
| Female                                    | 1.559733   | 1.565894  | 0.44 | 0.658 | .2180148                | 11.15872 |
|                                           |            |           |      |       |                         |          |
| MD_APC                                    |            |           |      |       |                         |          |
| APC                                       | 1.352925   | 1.880294  | 0.22 | 0.828 | .0887716                | 20.61927 |

|                                                                                                                                                  |          |          |       |       |          |          |
|--------------------------------------------------------------------------------------------------------------------------------------------------|----------|----------|-------|-------|----------|----------|
|                                                                                                                                                  |          |          |       |       |          |          |
| Clinician Variables                                                                                                                              |          |          |       |       |          |          |
| Specialty - Family Medicine                                                                                                                      | .1190707 | .1873057 | -1.35 | 0.176 | .0054552 | 2.598954 |
| Racial and Ethnic Discordance                                                                                                                    | .974337  | 1.178607 | -0.02 | 0.983 | .0910025 | 10.43195 |
| Patient Load                                                                                                                                     | 1.000284 | .0004472 | 0.64  | 0.525 | .9994083 | 1.001161 |
| Constant                                                                                                                                         | 2.68e-06 | .000016  | -2.15 | 0.031 | 2.27e-11 | .3173253 |
| Random effect                                                                                                                                    |          |          |       |       |          |          |
| Clinic-level Variance                                                                                                                            | 5.376304 | 5.182313 |       |       | .8128229 | 35.56082 |
| APC= advanced practice clinician; Racial and Ethnic Discordance = racial and ethnic minoritized group (Black, Latinx, Asian) vs not minoritized. |          |          |       |       |          |          |
